# Supplementary material for: Electrodeposited PEDOT:PSS-Al2O3 Improves the Steady-State Efficiency of Inverted Perovskite Solar Cells
Source: MDPI journal article supplement (doi:10.3390/polym13234162), 2021-11-28
Supplement: s1 [file s1]

# Electrodeposited PEDOT:PSS-Al<sub>2</sub>O<sub>3</sub> Improves the Steady-State Efficiency of Inverted Perovskite Solar Cells

Eider A. Erazo<sup>1</sup>, Martín Gómez<sup>2</sup>, Leonardo Rios<sup>3</sup>, Edgar J. Patiño<sup>3</sup>, María T. Cortés<sup>1,\*</sup>, Pablo Ortiz<sup>2</sup>

<sup>1</sup> Departamento de Química, Universidad de los Andes, Bogotá D.C. 111711, Colombia; ea.erazo@uniandes.edu.co (E.A.E.); marcorte@uniandes.edu.co (M.T.C.)

<sup>2</sup> Departamento de Ingeniería Química, Universidad de los Andes, Bogotá D.C. 111711, Colombia; m.gomezd@uniandes.edu.co (M.G.); portiz@uniandes.edu.co (P.O.)

<sup>3</sup> Superconductivity and Nanodevices Laboratory, Departamento de Física, Universidad de los Andes, Bogotá D.C. 111711, Colombia; l.rios954@uniandes.edu.co (L.R.); epatino@uniandes.edu.co (E.J.P.)

\* Correspondence: marcorte@uniandes.edu.co (M.T.C.)

## Supplementary material

**Table S1.** Mean and standard deviation (SD) of the photovoltaic parameters of solar cells containing different HTMs.

| HTM                   | PCE (%)<br>(Mean ± SD) | Jsc (mA cm <sup>-2</sup> )<br>(Mean ± SD) | Voc (V) (Mean<br>± SD) | FF (%)<br>(Mean ± SD) |
|-----------------------|------------------------|-------------------------------------------|------------------------|-----------------------|
| PEDOT:PSS-Cl          | 11.5 ± 0.6             | 16.3 ± 0.7                                | 0.918 ± 0.009          | 77 ± 1                |
| PEDOT-Al 0.50mC 200°C | 13.6 ± 0.5             | 19.6 ± 0.3                                | 0.951 ± 0.016          | 73 ± 2                |
| PEDOT-Al 0.75mC 200°C | 13.9 ± 0.5             | 19.8 ± 0.5                                | 0.957 ± 0.015          | 73 ± 1                |
| PEDOT-Al 0.50mC 225°C | 13.2 ± 0.7             | 18.8 ± 1.3                                | 0.948 ± 0.013          | 74 ± 2                |
| PEDOT-Al 0.75mC 225°C | 13.1 ± 0.5             | 19.1 ± 0.4                                | 0.950 ± 0.014          | 73 ± 2                |
| PEDOT-Al 0.50mC 240°C | 12.1 ± 0.6             | 19.2 ± 0.4                                | 0.936 ± 0.018          | 67 ± 2                |
| PEDOT-Al 0.75mC 240°C | 12.3 ± 0.5             | 19.7 ± 0.4                                | 0.955 ± 0.007          | 65 ± 2                |

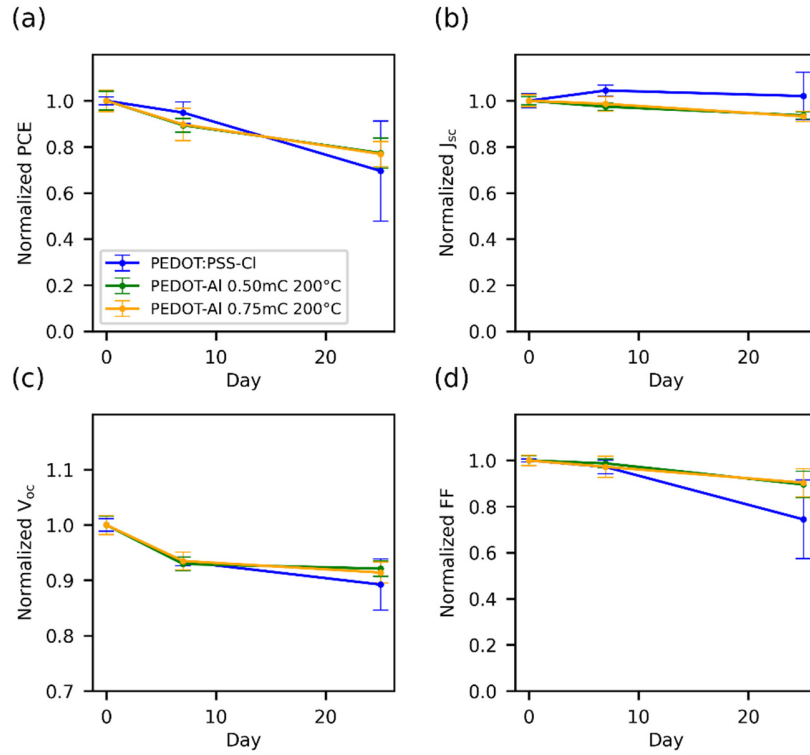

**Figure S1.** Evolution of (a) PCE, (b)  $J_{sc}$ , (c)  $V_{oc}$ , and (d) FF of the devices. The dots represent the mean value, and the bars show the standard deviation, 4 devices for each variation. The devices were stored under  $N_2$  atmosphere and exposed to 70% RH during the measurements.

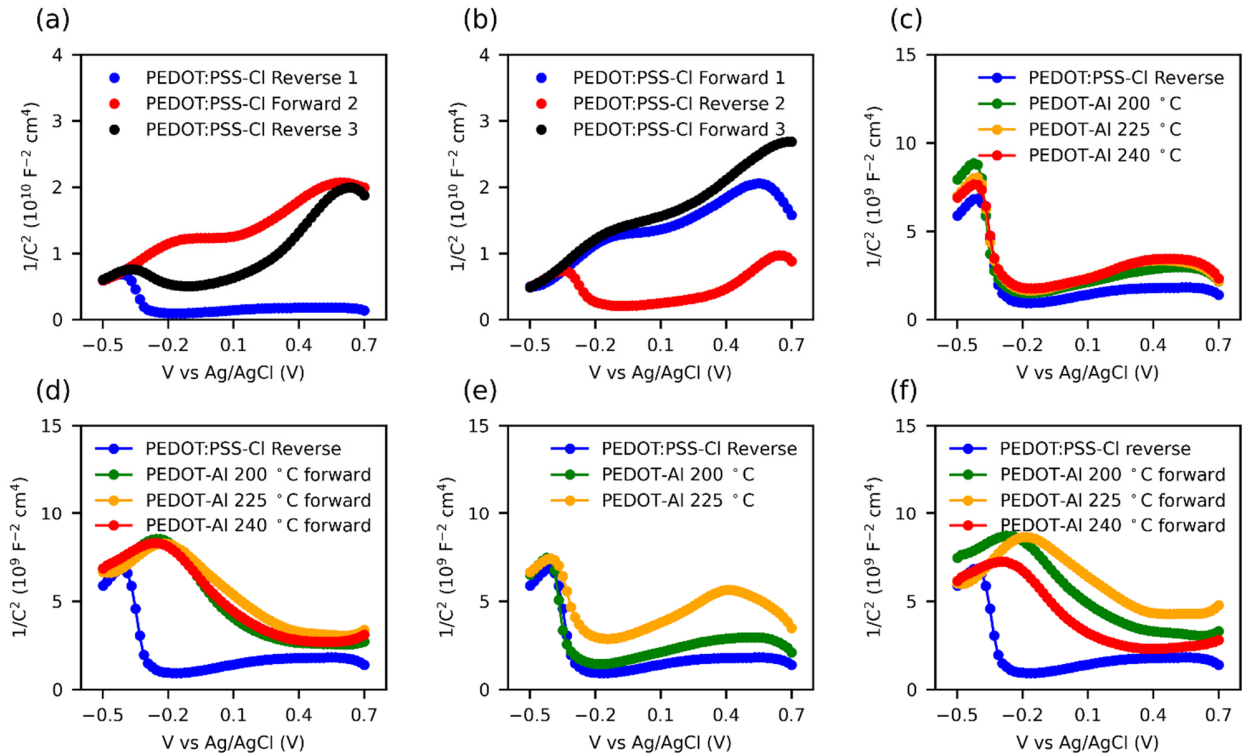

**Figure S2.** Mott-Schottky plots of the ITO/HTMs electrodes in 0.1 M NaCl. (a) and (b) are replicate of PEDOT:PSS-Cl films exposed to consecutive Mott-Schottky measurements, numbers represent scan order. (c) reverse and (d) forward plots of PEDOT-AI 0.50 mC (e) reverse and (f) forward plots of PEDOT-AI 0.75 mC, the reverse scan for PEDOT:PSS-Cl is plotted for comparison.

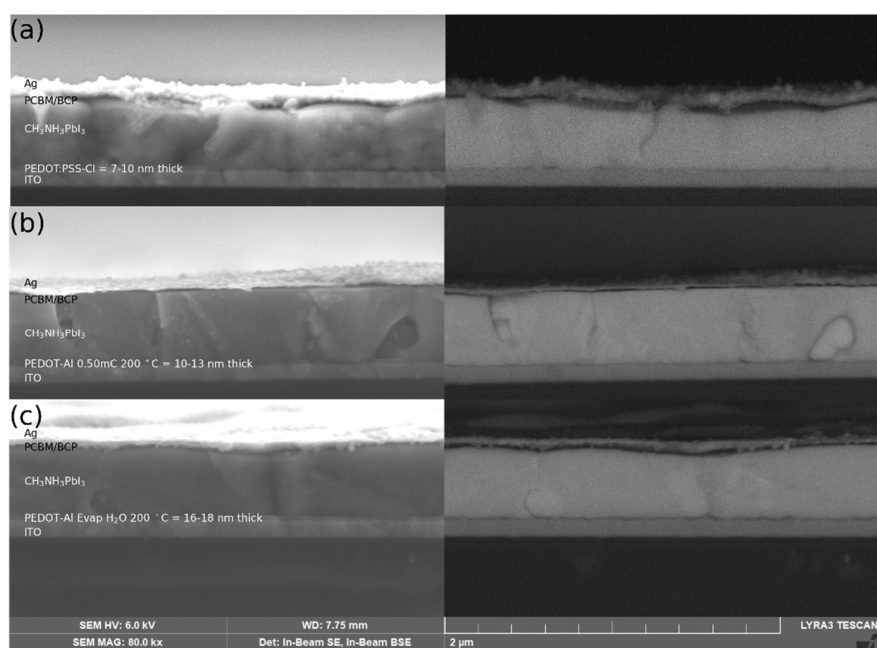

**Figure S3.** Cross-section SEM images of perovskite solar cells fabricated with (a) PEDOT:PSS-Cl, (b) PEDOT-Al 0.5 mC 200 °C, and (c) PEDOT:PSS-Cl with 2 nm Al PVD. The evaporated Al layer was submerged in water for 7 h and annealed for 1 h at 200 °C. Left secondary electrons (SE), right backscattered electrons (BSE)

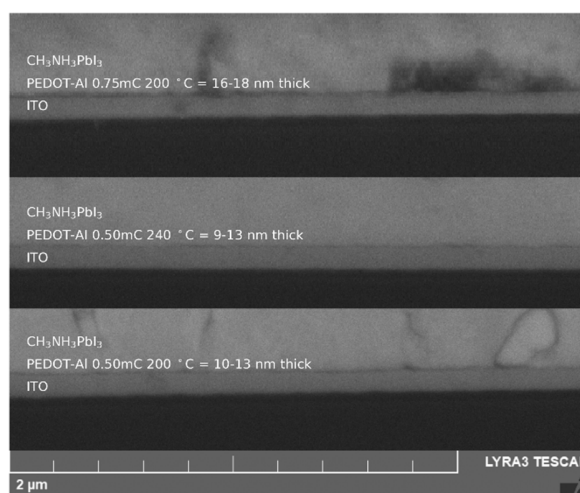

**Figure S4.** Cross-section SEM images of perovskite films deposited on various PEDOT-Al substrates. Backscattered electrons (BSE).

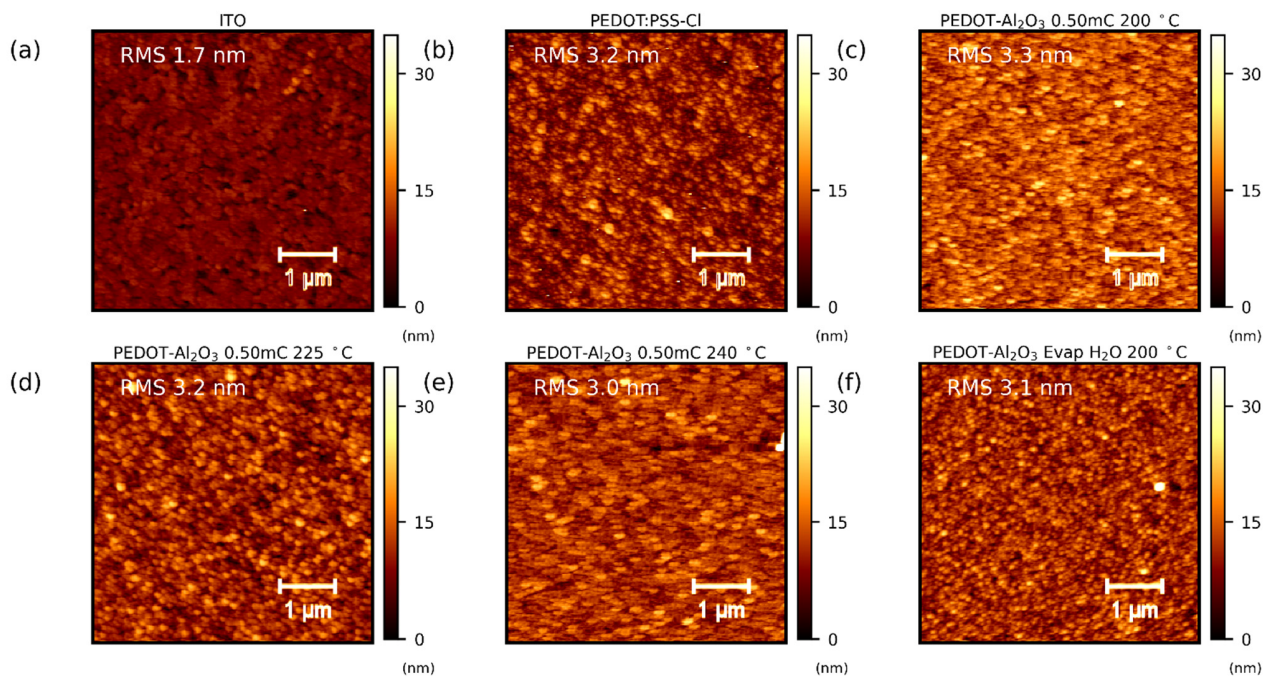

**Figure S5.** (a-f) AFM topographic images and RMS roughness of ITO, PEDOT:PSS-Cl, and PEDOT-Al substrates.

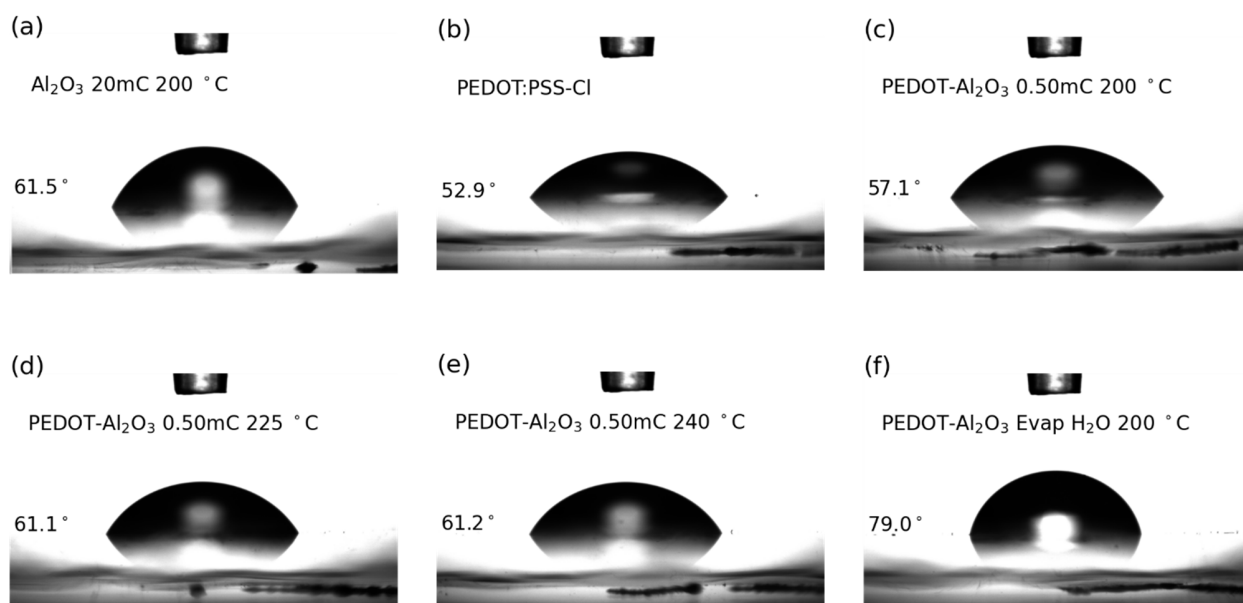

**Figure S6.** (a-f) Static contact angle of water over different materials deposited over ITO.

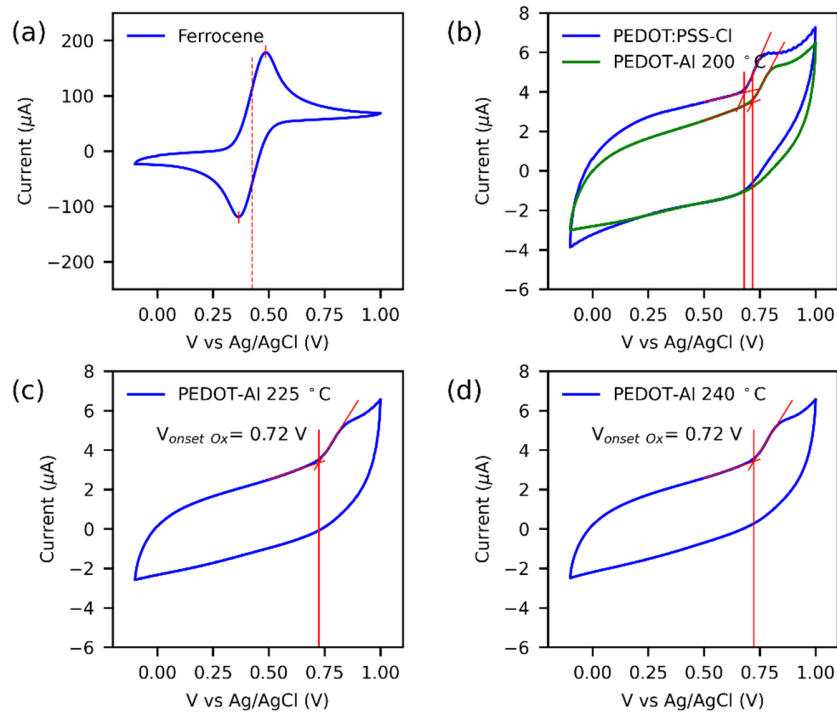

**Figure S7.** (a) Cyclic voltammetry of ferrocene reference. (b-d) Cyclic voltammetry of PEDOT-AI 0.50 mC HTMs. In (b) PEDOT:PSS-Cl and PEDOT-AI 0.5mC 200 °C films are compared, the  $V_{ox}$  onset was 0.68 and 0.72 V respectively.

$$HOMO = -(V_{ox} + 4.80 - V_{ox,ferrocene})eV \quad (1)$$

**Table S2.** HOMO levels estimated by cyclic voltammetry.

| Variation              | $V_{ox}(V)$ | HOMO (eV) |
|------------------------|-------------|-----------|
| PEDOT:PSS-Cl           | 0.68        | -5.06     |
| PEDOT-AI 0.50mC 200 °C | 0.72        | -5.10     |
| PEDOT-AI 0.50mC 225 °C | 0.72        | -5.10     |
| PEDOT-AI 0.50mC 240 °C | 0.72        | -5.10     |
| Ferrocene              | 0.42        |           |

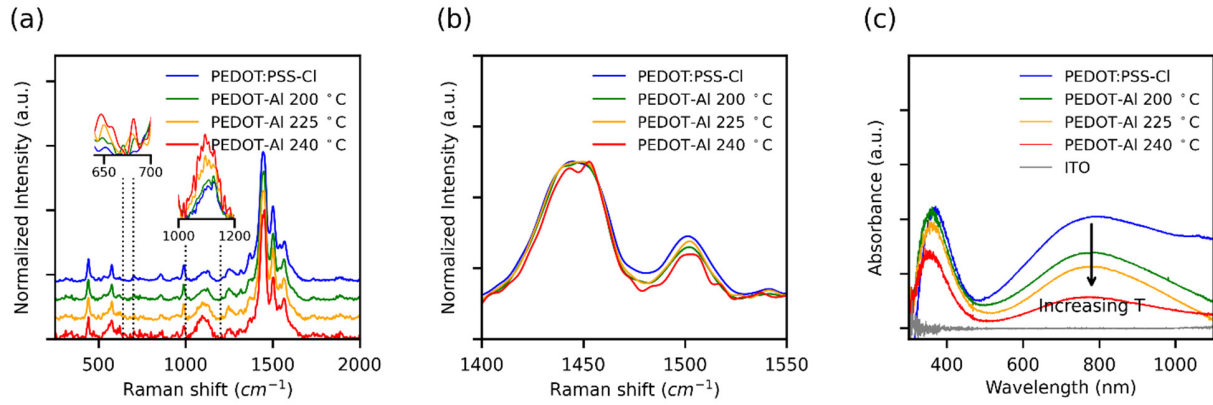

**Figure S8 .** (a) normalized Raman spectra of reference PEDOT:PSS-Cl and PEDOT-Al 0.75 mC bilayers, the insets show the Raman intensity comparison of the normalized data, in (b) the intensities in the range of the main peak are displayed, and (c) shows the corresponding UV-Vis spectra.

In the Mott-Schottky analysis, a plot of  $C^{-2}$  versus  $V$  yields a straight line whose slope allows calculation of the charge carrier density  $N_D$ .

$$N_D = \frac{2}{e\epsilon_r\epsilon_0 \text{Slope}} \quad (2)$$

Where  $e$  is de electron charge,  $\epsilon_r$  is the dielectric constant and  $\epsilon_0$  is the vacuum permittivity, the value of  $\epsilon_r$  value for PEDOT:PSS-Cl was chosen as  $\sim 2.5$ , [1]. The immersed area of the electrodes was  $0.52 \text{ cm}^2$ ,  $e = 1.602 \times 10^{-19} \text{ C}$  and  $\epsilon_0$  is  $8.8541 \times 10^{-12} \text{ Fm}^{-1}$ . [2]

**Table S3.** ND Charge carrier density from Mott-Schottky analysis whit forward and reverse scans on each film.

| Variation             | Forward Slope<br>( $10^9 \text{ F}^{-2} \text{ cm}^4 \text{ V}^{-1}$ ) | Forward<br>ND ( $\text{cm}^{-3}$ ) | Reverse Slope<br>( $10^9 \text{ F}^{-2} \text{ cm}^4 \text{ V}^{-1}$ ) | Reverse<br>ND ( $\text{cm}^{-3}$ ) |
|-----------------------|------------------------------------------------------------------------|------------------------------------|------------------------------------------------------------------------|------------------------------------|
| PEDOT:PSS-Cl          | 3.26                                                                   | $1.7 \times 10^{17}$               | 7.15                                                                   | $7.9 \times 10^{16}$               |
| PEDOT-Al 0.50mC 200°C | 5.65                                                                   | $1.0 \times 10^{17}$               | 8.14                                                                   | $6.9 \times 10^{16}$               |
| PEDOT-Al 0.50mC 200°C | 16.05                                                                  | $3.5 \times 10^{16}$               | 17.68                                                                  | $3.2 \times 10^{16}$               |
| PEDOT-Al 0.50mC 225°C | 20.63                                                                  | $2.7 \times 10^{16}$               | 24.47                                                                  | $2.3 \times 10^{16}$               |

**Table S4.** Charge transfer resistance extracted from the EIS fitting.

| Variation        | PEDOT:PSS-Cl | PEDOT-Al 200 °C | PEDOT- Al 225 °C | PEDOT- Al 240 °C |
|------------------|--------------|-----------------|------------------|------------------|
| Rct ( $\Omega$ ) | 56.12        | 57.04           | 148.67           | 257.22           |

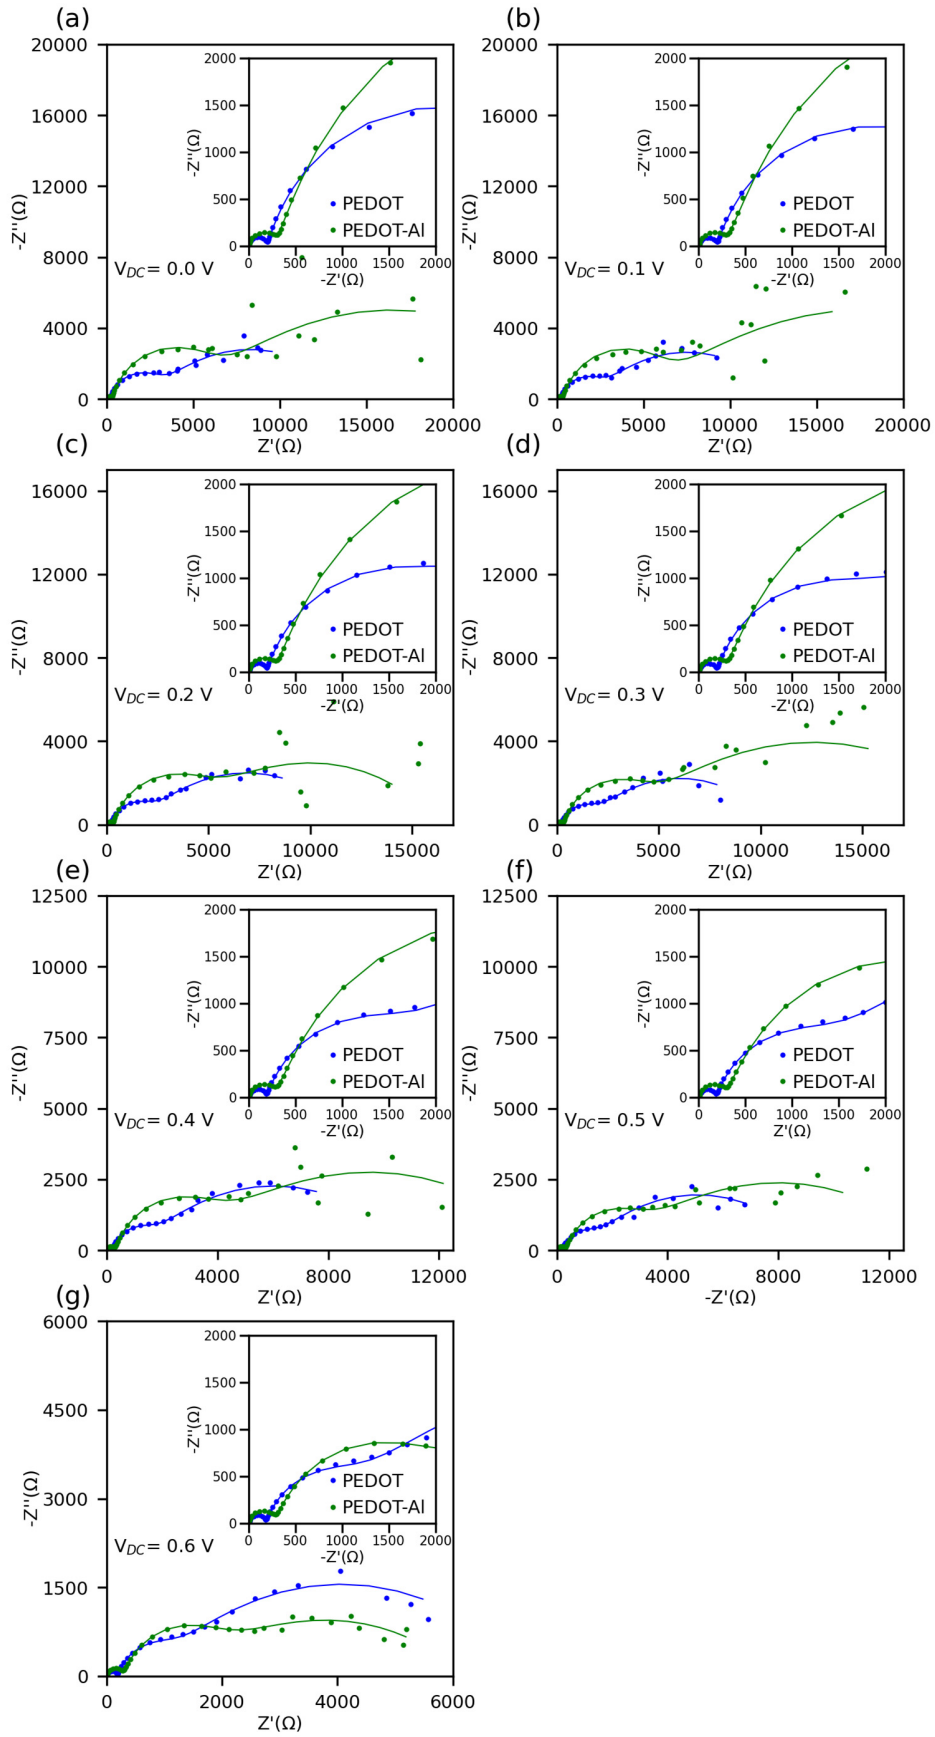

**Figure S9.** Nyquist plots for the solar cells at different applied DC voltage (a-g). The continuous lines represent the fitting of the IS data. The insets show a magnification of the data.

## References

1. Muckley, E.S.; Jacobs, C.B.; Vidal, K.; Mahalik, J.P.; Kumar, R.; Sumpter, B.G.; Ivanov, I.N. New Insights on Electro-Optical Response of Poly(3,4-ethylenedioxythiophene):Poly(styrenesulfonate) Film to Humidity. *ACS Appl. Mater. Interfaces* **2017**, *9*, 15880-15886, doi:10.1021/acsami.7b03128.
2. Sahoo, P.P.; Zoellner, B.; Maggard, P.A. Optical, electronic, and photoelectrochemical properties of the p-type  $\text{Cu}_{3-x}\text{VO}_4$  semiconductor. *J. Mater. Chem. A* **2015**, *3*, 4501-4509, doi:10.1039/c4ta04876h.
